# Supplementary material for: Physiological and Agronomic Traits of Certain Sugarcane Genotypes Grown under Field Conditions as Influenced by Early Drought Stress
Source: MDPI journal article supplement (doi:10.3390/agronomy11112319), 2021-11-16
Supplement: s1 [file s1]

Supplementary figure

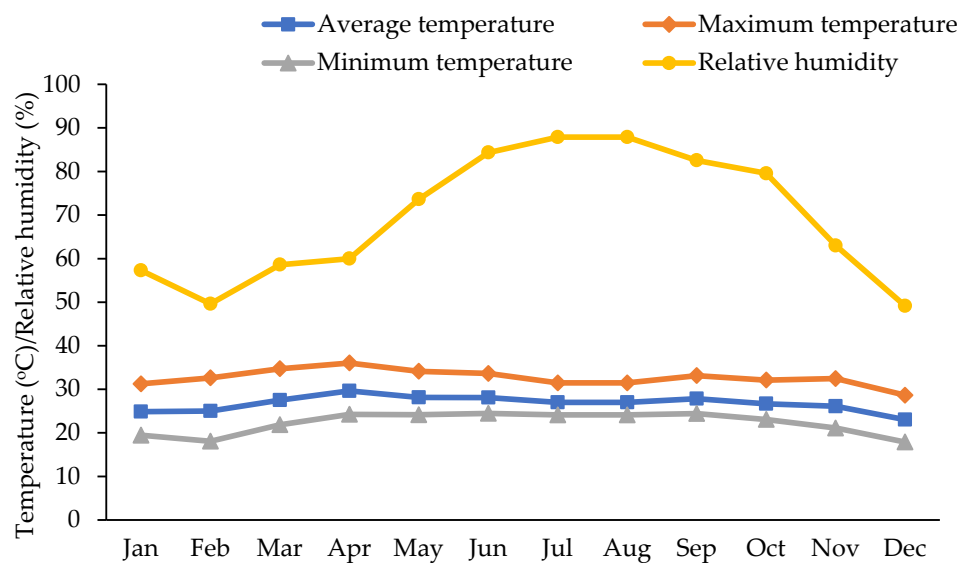

**Figure S1.** Average maximum and minimum temperature and relative humidity between January and December 2017
